# Supplementary material for: Structure reveals that BAK1 as a co-receptor recognizes the BRI1-bound brassinolide
Source: PubMed Central journal article supplement — Cell Res. 2013 Oct 15;23(11):1326–9. doi: 10.1038/cr.2013.131 (PMC3817550; doi:10.1038/cr.2013.131), 2013-10-15
Supplement: cr2013131x1.pdf [file cr2013131x1.pdf]

## Supplementary Information, Table S1

---

### Data Collection Statistics

|                                    |                        |
|------------------------------------|------------------------|
| Beam Line                          | Beam line BL17U1, SSRF |
| Space Group                        | P3 <sub>1</sub>        |
| Wavelength (Å)                     | 1.0                    |
| Number of reflections              | 45,084 (2,293)         |
| Cell dimensions                    |                        |
| <i>a</i> , <i>b</i> , <i>c</i> (Å) | 145.91, 145.91, 166.24 |
| $\alpha$ , $\beta$ , $\gamma$ (°)  | 90.0, 90.0, 120.0      |
| Resolution (Å)                     | 3.6(3.66-3.6)          |
| R <sub>sym</sub> (%)               | 6.1(54.4)              |
| <i>I</i> / $\sigma$ ( <i>I</i> )   | 11.5(2.1)              |
| Completeness (%)                   | 98.3(98.7)             |
| Redundancy                         | 2.6(2.6)               |

### Refinement Statistics

|                              |                      |
|------------------------------|----------------------|
| Resolution (Å)               | 50.0-3.6(3.68-3.6)   |
| No. Reflections              | 44,924 (2,696)       |
| Completeness (%)             | 98.0                 |
| Rwork/Rfree %                | 22.4/27.7(30.0/34.8) |
| Bond Lengths (Å)             | 0.013                |
| Bond Angles (°)              | 1.971                |
| Ramachandran (%) (from COOT) |                      |
| Preferred region (%)         | 93.2                 |
| Allowed region (%)           | 6.19                 |
| Outliers (%)                 | 0.61                 |

---

Highest resolution shell is shown in parenthesis
