# Supplementary material for: Structure reveals that BAK1 as a co-receptor recognizes the BRI1-bound brassinolide
Source: PubMed Central journal article supplement — Cell Res. 2013 Oct 15;23(11):1326–9. doi: 10.1038/cr.2013.131 (PMC3817550; doi:10.1038/cr.2013.131), 2013-10-15
Supplement: cr2013131x2.pdf [file cr2013131x2.pdf]

**Supplementary information, Figure S1**

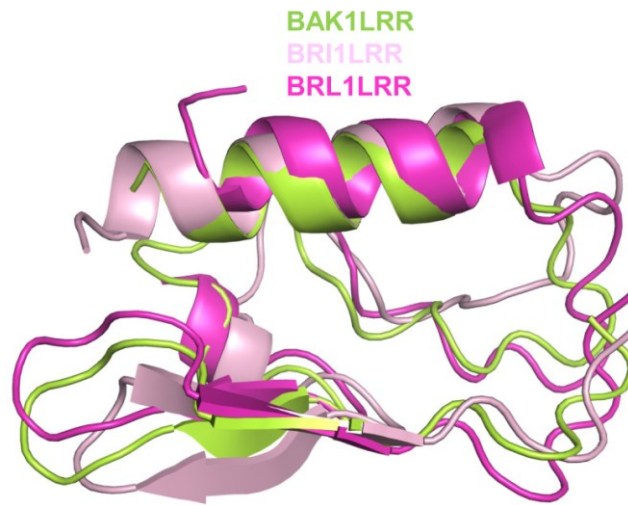

BAK1 shares a conserved N-terminal capping domain with BRI1 and BRL1.

Structural superposition of the N-terminal domains of BAK1LRR, BRI1LRR and BRL1LRR.
