# Supplementary material for: Structure reveals that BAK1 as a co-receptor recognizes the BRI1-bound brassinolide
Source: PubMed Central journal article supplement — Cell Res. 2013 Oct 15;23(11):1326–9. doi: 10.1038/cr.2013.131 (PMC3817550; doi:10.1038/cr.2013.131), 2013-10-15
Supplement: cr2013131x3.pdf [file cr2013131x3.pdf]

**Supplementary information, Figure S2**

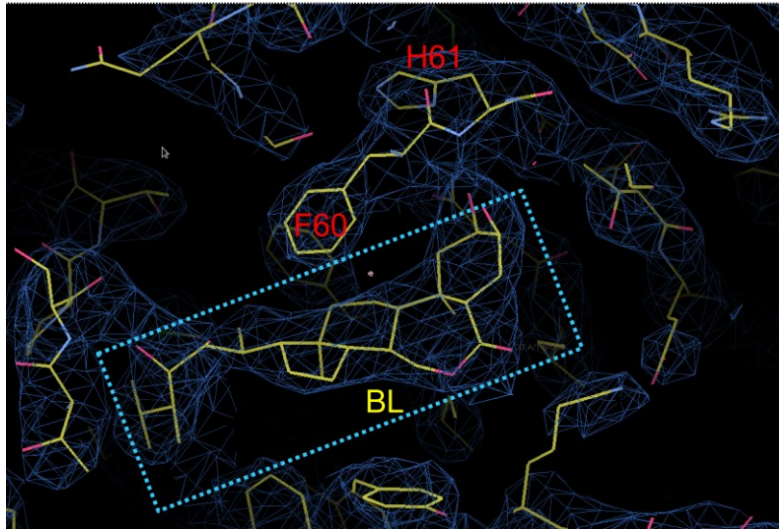

Electron density ( $2F_o - F_c$ ) contoured at 1.30 sigma (under COOT) around the BL binding region. BL is highlighted within the cyan dashed frame. Two residues from BAK1LRR are labeled. “BL”: brassinolide.
