# Supplementary material for: Structure reveals that BAK1 as a co-receptor recognizes the BRI1-bound brassinolide
Source: PubMed Central journal article supplement — Cell Res. 2013 Oct 15;23(11):1326–9. doi: 10.1038/cr.2013.131 (PMC3817550; doi:10.1038/cr.2013.131), 2013-10-15
Supplement: cr2013131x4.pdf [file cr2013131x4.pdf]

**Supplementary information, Figure S3**

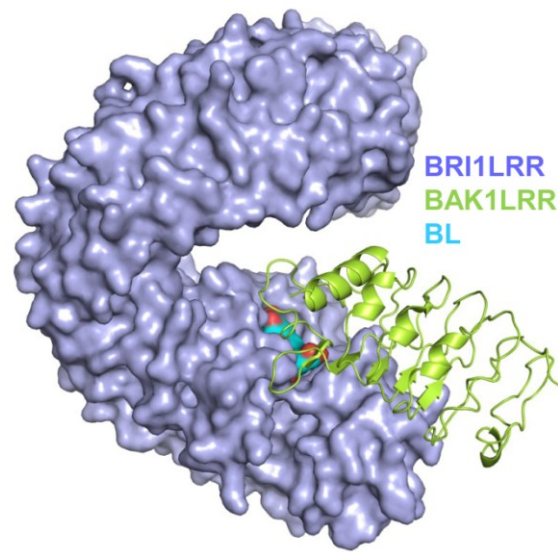

BAK1LRR interacts with a novel surface created by BL binding to BRI1LRR. BRI1LRR (slate) and BL (cyan) are shown in surface and BAK1LRR in cartoon (limon).
