# Supplementary material for: Structure reveals that BAK1 as a co-receptor recognizes the BRI1-bound brassinolide
Source: PubMed Central journal article supplement — Cell Res. 2013 Oct 15;23(11):1326–9. doi: 10.1038/cr.2013.131 (PMC3817550; doi:10.1038/cr.2013.131), 2013-10-15
Supplement: cr2013131x5.pdf [file cr2013131x5.pdf]

## Supplementary information, Figure S4

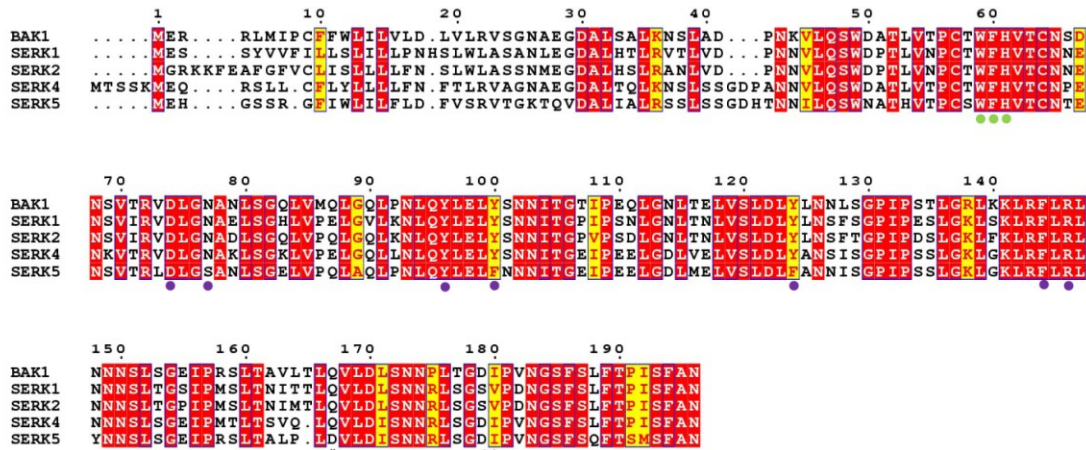

Sequence alignment among the LRR domains of SERK family protein

Conserved and similar residues are highlighted with red and yellow grounds respectively. Residues involved in BL recognition and interaction with BRI1LRR are indicated with solid limon and purple circles at bottom, respectively.
